# Supplementary material for: R2R3 MYB Transcription Factor GhMYB201 Promotes Cotton Fiber Elongation via Cell Wall Loosening and Very-Long-Chain Fatty Acid Synthesis
Source: Preprints.org preprint supplement (doi:10.20944/preprints202408.1531.v1), 2024-08-22
Supplement: Supplementary file 1 [file supplementary]

## Sheet: Primers
	Dataset S3 Primers used in this study
	Vector	Forward Primer	Reverse Primer
	Arabidopsis vector
	35S-GhMYB201	5’GGACAGGGTACGGATCCATGGGAAGACCTCCATGCTG3’	5’TTAAAGCAGGGAATTCCTAAAAAATTGAAGGCAATTCC3’
	CheckPrimer	5’GGATGAGATCGTCACCCAAGA3’	5’CGGTAAGGATCTGAGCTACAC3’
	konckout vector
	pRGEB32-ghmyb201	5’ATTCCCGGCTGGTGCACCTTAGCTTCTTCTTCAGATGTTTTAGAGCTAGAAATAGCAAG3’	5’CTTGCTATTTCTAGCTCTAAAACCCATTGAAGGAGGCTCCATATGCACCAGCCGGGAAT3’
	Sanger sequence primers	5’GGTCCTGGAAACTGGAGATCA3’	5’GAAGCATATGAAGAGGAGGTT3’
	Subcellular localization of GhMYB201
	35S-YFP-HA-GhMYB201	5’GTACGGATCCGTACTAGTATGGTGAGCAAGGGCGAGG3’	5’TTAAAGCAGGGAATTCCTAAAAAATTGAAGGCAATTCC3’
	35S-YFP	5’GTACGGATCCGTACTAGTATGGTGAGCAAGGGCGAGG3’	5’TTAAAGCAGGGAATTCTTACTTGTACAGCTCGTCCA3’
	RT-PCR
	GhMYB201	5’CTGGAGCTGGTTCAAGTAATC’3’	5’CTCCATTAATGCAACATCCTTC3’
	Gh_D13G1712	5’GATAATGACATAAAGAACTACTG3’	5’GAGAAATCAAATCACAGTTTGC3’
	Gh_A13G1399	5’GACAATGGCATAAAGAATTACTG3’	5’GAGAGATCAAATCATTGTTTGC3’
	Gh_A01G1563	5’CAAGCTTGGCTACCAATATCTC3’	5’GGCTTAGACATGAAGTAAACAG3’
	Gh_A03G1286	5’CAATCCTGTTGTCGAACCGC3’	5’GCACCAAAGGCCCTATTGTG3’
	Gh_A10G1051	5’GTTCGACTATGGAACCAACTC3’	5’GGTGAAGCTACCAGTGAGAC3’
	Gh_A13G1665	5’CAAGATCTGTTGTCAACTGAG3’	5’ACCAAAACAGGTATGGTAGCC3’
	GhRDL1	5’GATCAGGCAGTCTCAACAGA3’	5’CTCTAAAGGAACCATGTAAGC3’
	GhUbiquitin14	5’CAACGCTCCATCTTGTCCTT3’	5’TGATCGTCTTTCCCGTAAGC3’
	GhActin4	5’TTGCAGACCGTATGAGCAAG3’	5’ATCCTCCGATCCAGACACTG3’
	AtActin2	5’GATTCAGATGCCCAGAAGTCTTG3’	5’ACGGTCAGCGATACCTGAGA3’
	Yeast transactivation
	pGBKT7-GhMYB201 full length	5’CATGGAGGCCGAATTCATGGGAAGACCTCCATGCTG3’	5’TGCAGGTCGACGGATCCTTAGAAAATTGAAGGCAATTCC3’
	pGBKT7-GhMYB201 R2R3	5’CATGGAGGCCGAATTCATGGGAAGACCTCCATGCTG3’	5’TGCAGGTCGACGGATCCCTTCCTTAGCTTCTTCTTCAG3’
	pGBKT7-GhMYB201 R2R3M1	5’CATGGAGGCCGAATTCATGGGAAGACCTCCATGCTG3’	5’TGCAGGTCGACGGATCCCTTGGGTGACGATCTCATCC3’
	pGBKT7-GhMYB201 R2R3M1M2	5’CATGGAGGCCGAATTCATGGGAAGACCTCCATGCTG3’	5’TGCAGGTCGACGGATCCAGAACTCTCATCCAAAAGCC3’
	pGBKT7-GhMYB201 M1M2M3	5’CATGGAGGCCGAATTCTCCTCTTCATATGCTTCAAGC3’	5’TGCAGGTCGACGGATCCTTAGAAAATTGAAGGCAATTCC3’
	pGBKT7-GhMYB201 M2	5’CATGGAGGCCGAATTCATTATTAACCCAGAAAGGAAGC3’	5’TGCAGGTCGACGGATCCAGAACTCTCATCCAAAAGCC3’
	pGBKT7-GhMYB201 R2R3M1M3	5’CATGGAGGCCGAATTCATGGGAAGACCTCCATGCTG3’	5’CATCTGATCAATTTCTTCCTTTTCACCAGAATCTTGAAAAG3’
		5’AGATTCTGGTGAAAAGGAAGAAATTGATCAGATGATGG3’	5’TGCAGGTCGACGGATCCTTAGAAAATTGAAGGCAATTCC3’
	Y1H
	pGADT7-GhMYB201	5’CAGTGGTTCCACTAGTATGGGAAGACCTCCATGCTG3’	5’TTAAAGCAGGGAATTCCTAAAAAATTGAAGGCAATTCC3’
	Reporter
	pGreen II 0800-LUC-Gh_A01G1563	5’AGGGCGAATTGGGTACCGCGTGTCTATTGACCGTGTG3’	5’TTGGCGTCTTCCATGGTGTTGCAGTGGTGGAAATGAA3’
	pGreen II 0800-LUC-Gh_D01G1810	5’AGGGCGAATTGGGTACCGACTAGTGCTAGGCACACAG3’	5’TTGGCGTCTTCCATGGTGTTGCAGTGGTGGAAATGAA3’
	pGreen II 0800-LUC-Gh_A03G1286	5’AGGGCGAATTGGGTACCCCAACGGTTACTAATGCATGG3’	5’TTGGCGTCTTCCATGGATTGCAAGAGATAGAGAAATA3’
	pGreen II 0800-LUC-Gh_D02G1726	5’AGGGCGAATTGGGTACCCCGGCCTAGATAATATGACC3’	5’TTGGCGTCTTCCATGGATTGCAAGAGATAGAGAAATAAT3’
	pGreen II 0800-LUC-Gh_A10G1051	5’AGGGCGAATTGGGTACCCTAGTGACGGTTGTGGCTTC3’	5’TTGGCGTCTTCCATGGAGCTACAAATCCAACTCAATTT3’
	pGreen II 0800-LUC-Gh_A13G1665	5’AGGGCGAATTGGGTACCCTCTAACACGGCCTAAACCA3’	5’TTGGCGTCTTCCATGGAGAGAGAGAGGGATGCATTAA3’
	pGreen II 0800-LUC-Gh_D13G2029	5’AGGGCGAATTGGGTACCGACGACGTCACAATGACAAG3’	5’TTGGCGTCTTCCATGGGAGAGAGAGAGATGCATTAATG3’
	pGreen II 0800-LUC-Gh_D05G0507	5’AGGGCGAATTGGGTACCGTGGAGTGTGCATGCCTTTC3’	5’TTGGCGTCTTCCATGGGGCTCAACGTTCCTTCTTTG3’
	5’-end deletions of GhRDL promoter
	pGreen II 0800-LUC-Gh_D05G0507 2100	5’AGGGCGAATTGGGTACCGGGTTGAATTCTGGTATGTTG3’	5’TTGGCGTCTTCCATGGGGCTCAACGTTCCTTCTTTG3’
	pGreen II 0800-LUC-Gh_D05G0507 1600	5’AGGGCGAATTGGGTACCGAGTAGTTTATGGGGGAGTG3’	5’TTGGCGTCTTCCATGGGGCTCAACGTTCCTTCTTTG3’
	pGreen II 0800-LUC-Gh_D05G0507 1200	5’AGGGCGAATTGGGTACCAACCCCGTCGGTCCAAATCT3’	5’TTGGCGTCTTCCATGGGGCTCAACGTTCCTTCTTTG3’
	pGreen II 0800-LUC-Gh_D05G0507 600	5’AGGGCGAATTGGGTACCGTTCCAGTCTAAAAGACAATGG3’	5’TTGGCGTCTTCCATGGGGCTCAACGTTCCTTCTTTG3’
	pGreen II 0800-LUC-Gh_D05G0507 300	5’AGGGCGAATTGGGTACCGGCCATAACCAAGTGACGAA3’	5’TTGGCGTCTTCCATGGGGCTCAACGTTCCTTCTTTG3’
	pGreen II 0800-LUC-Gh_D05G0507 200	5’AGGGCGAATTGGGTACCCAGTTGGAGCCATTATGTTGG3’	5’TTGGCGTCTTCCATGGGGCTCAACGTTCCTTCTTTG3’
	pGreen II 0800-LUC-Gh_D05G0507 180	5’AGGGCGAATTGGGTACCGTTGAAAAATATTGTTGACAGTG3’	5’TTGGCGTCTTCCATGGGGCTCAACGTTCCTTCTTTG3’
